# Supplementary material for: Identification of approved and investigational drugs that inhibit hypoxia-inducible factor-1 signaling
Source: PubMed Central journal article supplement (PMC4884984; doi:10.18632/oncotarget.6995), 2016-01-23
Supplement: oncotarget-07-8172-s001.pdf [file oncotarget-07-8172-s001.pdf]

## Identification of approved and investigational drugs that inhibit hypoxia-inducible factor-1 signaling

### Supplementary Materials

**Supplementary Table S1: Known HIF-1 inhibitors and their analogs identified in the primary screen using the HIF-1 $\alpha$ -NanoLuc assay**

| Compound Name (CASN)       | IC <sub>50</sub> ( $\mu$ M) | Efficacy (%) | Structure Class    | Description                                                     | Known HIF-1 inhibitor? |
|----------------------------|-----------------------------|--------------|--------------------|-----------------------------------------------------------------|------------------------|
| Actinomycin D (50-76-0)    | 0.04                        | 99           | Phenoxazine        | Anti-cancer drug. DNA binder and transcription inhibitor.       | Yes [1]                |
| Berberine (633-65-8)       | 0.94                        | 116          | Alkaloid           | Anti-parasitic, anti-fungal, and anti-diarrheal drug.           | Yes [1]                |
| Celecoxib (169590-42-5)    | 10.59                       | 43           | NSAID              | Anti-inflammatory drug. COX2 inhibitor.                         | Yes [2]                |
| Cilnidipine (132203-70-4)  | 10.59                       | 63           | Dihydropyridine    | Anti-hypertension drug. Calcium channel blocker.                | Yes [3]                |
| Cycloheximide (66-81-9)    | 0.24                        | 92           | N/A                | Translation inhibitor.                                          | Yes [1]                |
| Cyclosporine (59865-13-3)  | 11.88                       | 87           | Cyclic peptide     | Immunosuppressant drug.                                         | Yes [1]                |
| Daunorubicin (20830-81-3)  | 0.75                        | 51           | Anthracycline      | Anti-cancer drug. DNA intercalator and topoisomerase inhibitor. | Yes [4]                |
| Deslanoside (17598-65-1)   | 0.30                        | 115          | Cardiac glycoside  | Drug to treat congestive heart failure.                         | No                     |
| Digitoxin (71-63-6)        | 0.03                        | 124          | Cardiac glycoside  | Drug to treat congestive heart failure.                         | Yes [5]                |
| Disulfiram (97-77-8)       | 0.03                        | 89           | Carbamate          | Drug to treat alcohol dependence. ALDH inhibitor.               | Yes [6]                |
| Emetine (316-42-7)         | 0.19                        | 136          | Alkaloid           | Anti-protozoal and drug to induce vomiting.                     | Yes [7]                |
| Erlotinib (183321-74-6)    | 2.66                        | 33           | Quinazoline        | Anti-cancer drug. EGFR inhibitor.                               | Yes [2]                |
| Epirubicin (56390-09-1)    | 0.30                        | 108          | Anthracycline      | Anti-cancer drug. DNA intercalator.                             | No                     |
| Flavopiridol (146426-40-6) | 1.06                        | 76           | Flavonoid alkaloid | Anti-cancer drug. CDK inhibitor.                                | Yes [8]                |
| Gefitinib (184475-35-2)    | 0.19                        | 86           | Quinazoline        | Anti-cancer drug. EGFR inhibitor.                               | Yes [2]                |
| Genistein (446-72-0)       | 8.41                        | 65           | Isoflavone         | Supplement.                                                     | Yes [1]                |
| Gimatecan (292618-32-7)    | 0.60                        | 108          | Quinoline alkaloid | Anti-cancer drug. Topoisomerase I inhibitor.                    | No                     |
| Idarubicin (57852-57-0)    | 0.75                        | 61           | Anthracycline      | Anti-cancer drug. DNA intercalator.                             | No                     |

|                             |       |     |                    |                                                                |          |
|-----------------------------|-------|-----|--------------------|----------------------------------------------------------------|----------|
| Isradipine (75695-93-1)     | 11.88 | 111 | Dihydropyridine    | Anti-hypertension drug. Calcium channel blocker.               | No       |
| Lercanidipine (132866-11-6) | 11.88 | 63  | Dihydropyridine    | Anti-hypertension drug. Calcium channel blocker.               | No       |
| Manidipine (89226-50-6)     | 9.44  | 86  | Dihydropyridine    | Anti-hypertension drug. Calcium channel blocker.               | No       |
| Mitoxantrone (70476-82-3)   | 2.38  | 80  | Anthracenedione    | Drug to treat multiple sclerosis.                              | Yes [9]  |
| Nelfinavir (159989-65-8)    | 21.13 | 120 | Benamide           | Anti-HIV drug. HIF-1 protease inhibitor.                       | Yes [10] |
| Nemorubicin (108852-90-0)   | 0.08  | 111 | Anthracycline      | Anti-cancer drug. DNA intercalator.                            | No       |
| Nicardipine (54527-84-3)    | 11.88 | 147 | Dihydropyridine    | Anti-hypertension drug. Calcium channel blocker.               | No       |
| Nimodipine (66085-59-4)     | 14.96 | 132 | Dihydropyridine    | Anti-hypertension drug. Calcium channel blocker.               | No       |
| Nitrendipine (39562-70-4)   | 14.96 | 157 | Dihydropyridine    | Anti-hypertension drug. Calcium channel blocker.               | No       |
| Ouabain (11018-89-6)        | 0.08  | 130 | Cardiac glycoside  | Drug to treat congestive heart failure.                        | Yes [5]  |
| Pirarubicin (72496-41-4)    | 11.88 | 97  | Anthracycline      | Anti-cancer drug. DNA intercalator.                            | No       |
| Proscillaridin A (466-06-8) | 0.01  | 101 | Cardiac glycoside  | Drug to treat congestive heart failure and cardiac arrhythmia. | Yes [5]  |
| Rotenone (83-79-4)          | 0.19  | 91  | Rotenone           | Insecticide. Inhibitor of mitochondrial electron transport.    | Yes [1]  |
| Sorafenib (284461-73-0)     | 13.33 | 156 | Diarylurea         | Anti-cancer drug. RAF inhibitor.                               | Yes [11] |
| Topotecan (123948-87-8)     | 6.68  | 98  | Quinoline alkaloid | Anti-cancer drug. Topoisomerase I inhibitor.                   | Yes [2]  |
| Vatanidipine (116308-55-5)  | 1.19  | 103 | Dihydropyridine    | Anti-hypertension drug. Calcium channel blocker.               | No       |
| Vorinostat (149647-78-9)    | 1.50  | 51  | Hydroxamic acid    | Anti-cancer drug. HDAC inhibitor.                              | Yes [2]  |

ALDH: Acetaldehyde dehydrogenase. CDK: Cyclin-dependent kinase. EGFR: Epidermal growth factor receptor. HDAC: Histone deacetylase. HIV: human immunodeficiency virus. NSAID: Non-steroidal anti-inflammatory drug

**Supplementary Table S2: Effects of small molecular inhibitors and siRNA oligos on HIF-1 $\alpha$ -NanoLuc activity**

| Target                   | Pathway inhibitors (primary screen)<br>HIF-1 $\alpha$ -NanoLuc Activity<br>IC <sub>50</sub> (Efficacy)                                           | Pathway inhibitors (validation)<br>HIF-1 $\alpha$ -NanoLuc Activity<br>IC <sub>50</sub> (Efficacy)                                                                                                                 | siRNA oligos<br>HIF-1 $\alpha$ -NanoLuc Activity*<br>(Viability Cell Number)                                                                                                                                                                                                                                                                                                                                                                                    |
|--------------------------|--------------------------------------------------------------------------------------------------------------------------------------------------|--------------------------------------------------------------------------------------------------------------------------------------------------------------------------------------------------------------------|-----------------------------------------------------------------------------------------------------------------------------------------------------------------------------------------------------------------------------------------------------------------------------------------------------------------------------------------------------------------------------------------------------------------------------------------------------------------|
| Akt/PKB                  | MK-2206: 0.42 $\mu$ M (45%)                                                                                                                      | AZD5363: 1.50 $\pm$ 0.21 $\mu$ M (71 $\pm$ 5%)                                                                                                                                                                     | <i>AKT1</i> : 45 $\pm$ 2% (88%)<br><i>AKT2</i> : 69 $\pm$ 5% (102%)<br><i>AKT3</i> : 19 $\pm$ 0% (58%)                                                                                                                                                                                                                                                                                                                                                          |
| BCR/ABL                  | Bosutinib: 11.88 $\mu$ M (58%)<br>Dasatinib: 0.94 $\mu$ M (82%)<br>Imatinib: 33.49 $\mu$ M (28%)                                                 | Dasatinib: 23.58 $\pm$ 8.59 $\mu$ M (46 $\pm$ 3%)                                                                                                                                                                  | <i>BCR</i> : 11 $\pm$ 1% (62%)<br><i>ABL1</i> : 141 $\pm$ 17% (110%)<br><i>ABL2</i> : 71 $\pm$ 10% (54%)                                                                                                                                                                                                                                                                                                                                                        |
| EGFR                     | Canertinib: 2.37 $\mu$ M (50%)<br>Erlotinib: 2.66 $\mu$ M (33%)<br>Gefitinib: 18.83 $\mu$ M (57%)<br>Lapatinib: Inactive<br>Tandutinib: Inactive | Canertinib: 24.84 $\pm$ 10.72 $\mu$ M (88 $\pm$ 20%)<br>Erlotinib: 6.64 $\pm$ 2.42 $\mu$ M (35 $\pm$ 6%)<br>Gefitinib: 19.41 $\pm$ 1.31 $\mu$ M (31 $\pm$ 3%)<br>Lapatinib: 20.17 $\pm$ 1.31 $\mu$ M (50 $\pm$ 6%) | <i>EGFR</i> : 10 $\pm$ 1% (50%)                                                                                                                                                                                                                                                                                                                                                                                                                                 |
| ERK                      | N/A                                                                                                                                              | GDC-0994: 6.11 $\pm$ 1.64 $\mu$ M (63 $\pm$ 7%)                                                                                                                                                                    | <i>MAPK1</i> : 52 $\pm$ 10% (61%)<br><i>MAPK3</i> : 52 $\pm$ 6% (84%)                                                                                                                                                                                                                                                                                                                                                                                           |
| IGF and Insulin receptor | Picropodphyllin: 0.53 $\mu$ M (159%*)                                                                                                            | Picropodphyllin: 0.53 $\mu$ M (159%*)                                                                                                                                                                              | <i>IGF1R</i> : 57 $\pm$ 5% (87%)<br><i>IGF2R</i> : 60 $\pm$ 5% (81%)<br><i>INSR</i> : 92 $\pm$ 2% (73%)<br><i>INSRR</i> : 73 $\pm$ 1% (87%)                                                                                                                                                                                                                                                                                                                     |
| HDAC                     | Quercetine: 0.84 $\mu$ M (44%)<br>Vorinostat: 1.50 $\mu$ M (51%)                                                                                 | Trichostain A: 0.67 $\pm$ 0.26 $\mu$ M (55 $\pm$ 4%)                                                                                                                                                               | N/A                                                                                                                                                                                                                                                                                                                                                                                                                                                             |
| MEK                      | PD 184352: 0.84 $\mu$ M (64%)<br>Selumetinib: 0.04 $\mu$ M (62%)                                                                                 | PD 184352: 13.74 $\pm$ 0.93 $\mu$ M (99 $\pm$ 2%)<br>Selumetinib: 1.49 $\pm$ 1.30 $\mu$ M (48 $\pm$ 10%)<br>Trametinib: 2.98 $\pm$ 4.64 nM (69 $\pm$ 5%)                                                           | <i>MAP2K1</i> : 21 $\pm$ 3% (74%)<br><i>MAP2K2</i> : 89 $\pm$ 8% (103%)                                                                                                                                                                                                                                                                                                                                                                                         |
| MNK                      | N/A                                                                                                                                              | N/A                                                                                                                                                                                                                | <i>MKNK1</i> : 117 $\pm$ 6% (100%)<br><i>MKNK2</i> : 56 $\pm$ 2% (79%)                                                                                                                                                                                                                                                                                                                                                                                          |
| mTOR                     | PP-242: 0.05 $\mu$ M (34%)                                                                                                                       | PP-242: 0.45 $\pm$ 0.20 $\mu$ M (88 $\pm$ 2%)                                                                                                                                                                      | <i>FRAP1</i> : 43 $\pm$ 11% (78%)                                                                                                                                                                                                                                                                                                                                                                                                                               |
| p70 S6K                  | N/A                                                                                                                                              | N/A                                                                                                                                                                                                                | <i>RPS6KB1</i> : 28 $\pm$ 1% (69%)<br><i>RPS6KB2</i> : 52 $\pm$ 2% (97%)                                                                                                                                                                                                                                                                                                                                                                                        |
| PDK                      | N/A                                                                                                                                              | N/A                                                                                                                                                                                                                | <i>PDPK1</i> : 53 $\pm$ 2% (91%)                                                                                                                                                                                                                                                                                                                                                                                                                                |
| PI3K                     | N/A                                                                                                                                              | LY-294002: 14.58 $\pm$ 3.54 $\mu$ M (50 $\pm$ 9%)<br>PI-103: 2.77 $\pm$ 0.04 $\mu$ M (80 $\pm$ 3%)<br>Wortmannin: 0.99 $\pm$ 0.22 $\mu$ M (71 $\pm$ 4%)                                                            | <i>PIK3R1</i> : 72 $\pm$ 5% (110%)<br><i>PIK3R2</i> : 41 $\pm$ 0% (72%)<br><i>PIK3R3</i> : 108 $\pm$ 19% (109%)<br><i>PIK3R4</i> : 15 $\pm$ 1% (92%)<br><i>PIK3C2A</i> : 4 $\pm$ 0% (33%)<br><i>PIK3C2B</i> : 73 $\pm$ 3% (77%)<br><i>PIK3C2G</i> : 13 $\pm$ 1% (73%)<br><i>PIK3C3</i> : 49 $\pm$ 4% (75%)<br><i>PIK3CA</i> : 42 $\pm$ 1% (88%)<br><i>PIK3CB</i> : 95 $\pm$ 3% (95%)<br><i>PIK3CD</i> : 113 $\pm$ 8% (79%)<br><i>PIK3CG</i> : 44 $\pm$ 6% (91%) |

|       |                                                                                                                                                                           |                                                                                                                                                                                                                                                                               |                                                                                                                                                                                                                                                                                                                                                                                                                                                                                                                            |
|-------|---------------------------------------------------------------------------------------------------------------------------------------------------------------------------|-------------------------------------------------------------------------------------------------------------------------------------------------------------------------------------------------------------------------------------------------------------------------------|----------------------------------------------------------------------------------------------------------------------------------------------------------------------------------------------------------------------------------------------------------------------------------------------------------------------------------------------------------------------------------------------------------------------------------------------------------------------------------------------------------------------------|
| PKC   | Enzastaurin: 14.96 $\mu$ M (39%)<br>Quercetine: 0.84 $\mu$ M (44%)<br>Tamoxifen: 29.85 $\mu$ M (96%)                                                                      | Enzastaurin: 2.06 $\pm$ 3.30 $\mu$ M (67 $\pm$ 6%)<br>Quercetine: 37.22 $\pm$ 0.00 $\mu$ M (37 $\pm$ 1%)<br>Tamoxifen: 30.73 $\pm$ 5.74 $\mu$ M (107 $\pm$ 6%)                                                                                                                | <i>PRKCA</i> : 46 $\pm$ 3% (73%)<br><i>PRKCB1</i> : 32 $\pm$ 1% (69%)<br><i>PRKCD</i> : 31 $\pm$ 4% (68%)<br><i>PRKCE</i> : 53 $\pm$ 2% (80%)<br><i>PRKCG</i> : 76 $\pm$ 2% (82%)<br><i>PRKCH</i> : 26 $\pm$ 5% (55%)<br><i>PRKCI</i> : 38 $\pm$ 2% (84%)<br><i>PRKCLI</i> : 103 $\pm$ 13% (97%)<br><i>PRKCL2</i> : 63 $\pm$ 1% (75%)<br><i>PRKCM</i> : 23 $\pm$ 3% (74%)<br><i>PRKCN</i> : 23 $\pm$ 4% (61%)<br><i>PRKCQ</i> : 86 $\pm$ 8% (81%)<br><i>PRKCSH</i> : 69 $\pm$ 2% (81%)<br><i>PRKCZ</i> : 36 $\pm$ 4% (81%) |
| PLK   | N/A                                                                                                                                                                       | Volasertib: 9.57 $\pm$ 5.60 $\mu$ M (78 $\pm$ 14%)                                                                                                                                                                                                                            | <i>PLK1</i> : 7 $\pm$ 1% (28%)<br><i>PLK2</i> : 112 $\pm$ 13% (78%)<br><i>PLK3</i> : 36 $\pm$ 1% (83%)<br><i>PLK4</i> : 18 $\pm$ 1% (68%)                                                                                                                                                                                                                                                                                                                                                                                  |
| RAF   | Sorafenib: 1.50 $\mu$ M (46%)                                                                                                                                             | Dabrafenib: 0.47 $\pm$ 0.24 $\mu$ M (26 $\pm$ 13%)<br>Sorafenib: 23.59 $\pm$ 2.71 $\mu$ M (100 $\pm$ 6%)<br>TAK-632: 1.41 $\pm$ 0.23 $\mu$ M (85 $\pm$ 2%)<br>Vemurafenib: 13.59 $\pm$ 6.38 $\mu$ M (66 $\pm$ 6%)                                                             | <i>ARAF1</i> : 88 $\pm$ 4% (72%)<br><i>BRAF</i> : 27 $\pm$ 3% (64%)<br><i>RAF1</i> : 11 $\pm$ 1% (78%)                                                                                                                                                                                                                                                                                                                                                                                                                     |
| SIRT  | N/A                                                                                                                                                                       | AGK2: 19.50 $\pm$ 2.49 $\mu$ M (107 $\pm$ 9%)<br>Cambinol: Inactive<br>EX-527: Inactive<br>Quercetine: 37.22 $\pm$ 0.00 $\mu$ M (37 $\pm$ 1%)<br>Resveratrol: 41.10 $\pm$ 8.51 $\mu$ M (43 $\pm$ 12%)<br>Suramin: 24.54 $\pm$ 3.13 $\mu$ M (41 $\pm$ 7%)                      | <i>SIRT2</i> : 45 $\pm$ 13% (59%)<br><i>SIRT3</i> : 62 $\pm$ 9% (64%)<br><i>SIRT4</i> : 156 $\pm$ 52% (65%)<br><i>SIRT5</i> : 194 $\pm$ 37% (90%)<br><i>SIRT6</i> : 53 $\pm$ 15% (52%)<br><i>SIRT7</i> : 118 $\pm$ 23% (88%)                                                                                                                                                                                                                                                                                               |
| TOPO  | Daunorubicin: 0.75 $\mu$ M (50%)<br>Gimatecan: 0.60 $\mu$ M (108%)<br>Mitoxantrone: 2.37 $\mu$ M (80%)<br>Quercetine: 0.84 $\mu$ M (44%)<br>Topotecan: 6.68 $\mu$ M (98%) | Camptothecin: 0.57 $\pm$ 0.04 $\mu$ M (102 $\pm$ 5%)<br>Daunorubicin: 1.96 $\pm$ 0.35 $\mu$ M (98 $\pm$ 8%)<br>Mitoxantrone: 7.65 $\pm$ 2.13 $\mu$ M (110 $\pm$ 5%)<br>Quercetine: 37.22 $\pm$ 0.00 $\mu$ M (37 $\pm$ 1%)<br>Topotecan: 2.10 $\pm$ 0.24 $\mu$ M (99 $\pm$ 6%) | N/A                                                                                                                                                                                                                                                                                                                                                                                                                                                                                                                        |
| VEGFR | Axitinib: Inactive<br>Sorafenib: 1.50 $\mu$ M (46%)<br>SU-5416: 23.71 $\mu$ M (67%)<br>Sunitinib: 1.68 $\mu$ M (60%)                                                      | Sorafenib: 23.59 $\pm$ 2.71 $\mu$ M (100 $\pm$ 6%)<br>SU-5416: 12.23 $\pm$ 7.55 $\mu$ M (57 $\pm$ 22%)<br>Sunitinib: 11.34 $\pm$ 3.71 $\mu$ M (80 $\pm$ 15%)                                                                                                                  | <i>FLT1</i> : 172 $\pm$ 5% (124%)<br><i>FLT3</i> : 52 $\pm$ 1% (83%)<br><i>FLT4</i> : 10 $\pm$ 3% (51%)                                                                                                                                                                                                                                                                                                                                                                                                                    |
| VHL   | N/A                                                                                                                                                                       | N/A                                                                                                                                                                                                                                                                           | <i>VHL</i> : 19 $\pm$ 4% (35%)                                                                                                                                                                                                                                                                                                                                                                                                                                                                                             |

\*The HIF-1 $\alpha$ -NanoLuc intensity values of each siRNA experiment were normalized to a positive transfection control (full inhibition; 0% HIF-1 $\alpha$ -NanoLuc activity) and a non-targeting reference (no activation/inhibition; 100% HIF-1 $\alpha$ -NanoLuc activity).

IGF: Insulin-like growth factor. IGFR: Insulin-like growth factor receptor. INSR: Insulin receptor. INSRR: Insulin receptor-related receptor. MAP2K: Mitogen-activated protein kinase kinase. MAPK: Mitogen-activated protein kinase. MNK or MKNK: MAPK-interacting serine/threonine-protein kinase. PI3K: Phosphoinositide 3-kinase. Akt/PKB: Protein kinase B. mTOR: Mammalian target of rapamycin. PDK or PDPK: Proline-directed protein kinase. VHL: Von Hippel-Lindau tumor suppressor. SIRT: Sirtuin. PLK: Polo-like kinase.

**Supplementary Table S3: Top 10 canonical pathways identified by siRNA screen using the HIF-1 $\alpha$ -NanoLuc assay**

| Rank | Canonical Pathways                             | Score<br>-log(p-value) | Ratio           | Targets                                                                                                                                                                                                                                                                                                                                                                                                                                                                                                                                                                                              |
|------|------------------------------------------------|------------------------|-----------------|------------------------------------------------------------------------------------------------------------------------------------------------------------------------------------------------------------------------------------------------------------------------------------------------------------------------------------------------------------------------------------------------------------------------------------------------------------------------------------------------------------------------------------------------------------------------------------------------------|
| 1    | Salvage pathways of pyrimidine ribonucleotides | 78.80                  | 79/94<br>(79%)  | <i>MAP2K4, MAPK1, SGK1, CSNK1A1, NME2, LIMK2, LIMK1, NME6, PAK1, AK1, CDK8, MAP2K2, PIMI, MAPK3, PRPF4B, PRKAA1, HIPK1, AK7, MAP3K9, CDK18, GRK4, NME4, AKT2, DAPK1, PRKCQ, NME5, CDK7, CSNK1D, CDK6, GRK5, PKN1, NME3, ARAF, PRKCD, GRK6, UCK1, PRKCH, MAP2K3, PAK7, MAPK7, NEK2, MAK, CDK2, MAP2K6, NME1, DMPK, CDK4, TTK, NME7, IRAK1, BRAF, PRKX, CDK5, PRKAA2, PRKCE, CMPK1, MAP2K1, MAP3K6, MAPK8, MAPK6, MAPK9, PLK1, CDK1, AK5, PAK3, PAK2, MAP3K8, AK4, POMK, UCK2, EIF2AK2, UCKL1, ACVR2A, DYRK1A</i>                                                                                      |
| 2    | Pyridoxal 5'-phosphate salvage pathway         | 74.00                  | 60/64<br>(94%)  | <i>MAP2K4, MAPK1, SGK1, CSNK1A1, LIMK2, LIMK1, PAK1, CDK8, MAP2K2, PIMI, MAPK3, PRPF4B, PRKAA1, HIPK1, MAP3K9, CDK18, GRK4, AKT2, DAPK1, PRKCQ, CDK7, CDK6, CSNK1D, GRK5, PKN1, ARAF, PRKCD, GRK6, PRKCH, PAK7, MAP2K3, MAPK7, NEK2, MAK, CDK2, MAP2K6, DMPK, CDK4, TTK, IRAK1, BRAF, PRKX, CDK5, PRKAA2, PRKCE, MAP2K1, PDXK, MAP3K6, MAPK8, MAPK6, MAPK9, PLK1, CDK1, PAK3, PAK2, MAP3K8, POMK, EIF2AK2, ACVR2A, DYRK1A</i>                                                                                                                                                                        |
| 3    | NF $\kappa$ B signaling                        | 57.20                  | 65/107<br>(61%) | <i>MAP2K4, MAP3K15, RAF1, MAP3K11, MAPK1, PIK3R1, PDPK1, MAP3K4, PIK3R4, ROCK2, IKBKB, MAP3K10, IKBKG, MAP2K2, MAPK3, PIK3CG, MAP3K7, ATM, MAP3K2, PIK3C2B, MAP3K14, MAP3K9, RPS6KB1, AKT2, MAP3K13, RAC1, MAPK12, TRAF6, PIK3R3, MAP3K12, RPS6KA6, PRKCD, MAPK10, PIK3CD, RPS6KA1, MAPK7, RELA, PIK3CA, RPS6KA3, PIK3R5, TRIO, MAP3K5, PRKCZ, AKT1, PIK3C3, NTRK1, RPS6KB2, AKT3, RPS6KA2, CHUK, PIK3R2, MAP2K1, MAP3K6, PIK3C2A, MAP3K1, MAPK8, PIK3C2G, MAPK9, IKBKE, RPS6KA5, ROCK1, MAP3K8, PIK3CB, RPS6KA4, MAP3K3</i>                                                                         |
| 4    | NGF signaling                                  | 52.70                  | 79/173<br>(46%) | <i>PRKACB, RAF1, TGFBR1, TGFBR3, PIK3R1, BMPR1B, PIK3R4, TGFBR2, FGFR3, IKBKB, IKBKG, LCK, FGFR4, PIK3CG, CSNK2A1, MAP3K7, GSK3B, TAB1, PDGFRB, ATM, MAP3K14, PIK3C2B, AKT2, PRKCQ, FGFR1, FGFR2, TBK1, DDR1, PIK3R3, TRAF6, ARAF, PRKACG, ZAP70, PRKACA, PIK3CD, INSR, FGFR1, MAP2K6, RELA, PIK3CA, PIK3R5, BMPR2, TNFAIP3, PRKCZ, IRAK1, BRAF, AKT1, BMPR1A, PIK3C3, NTRK1, PDGFRA, IGF1R, AKT3, PIK3R2, CSNK2B, CHUK, EGFR, MAP2K7, FLT1, PIK3C2A, MAP3K1, FLT4, MAPK8, PIK3C2G, IRAK3, IGF2R, CSNK2A2, TLR4, NTRK2, RIPK1, NTRK3, MAP3K8, PIK3CB, EIF2AK2, KDR, MAP4K4, MAP3K3, IRAK4, PRKCB</i> |
| 5    | GNRH signaling                                 | 52.60                  | 67/129<br>(52%) | <i>MAP2K4, PRKACB, MAP3K15, RAF1, MAP3K11, MAPK1, MAP3K4, MAPK13, PTK2, MAP3K10, PAK1, CAMK2D, CAMK2A, MAP2K2, MAPK3, MAP3K7, PRKD3, PRKDI, MAP3K2, MAP3K14, MAP3K9, PRKCQ, MAP3K13, RAC1, MAPK12, MAP3K12, PRKCD, PRKACG, PRKACA, MAPK10, PRKCH, MAP2K3, PAK7, MAPK7, CAMK2G, MAP2K6, RELA, MAP3K5, MAPK11, PRKCZ, PRKAG1, PRKAR1B, PRKCE, MAP2K1, EGFR, PRKCA, CAMK2B, SRC, MAP2K7, PAK4, PAK6, MAP3K6, MAP3K1, PRKAR2A, MAPK8, MAPK9, PRKCG, PRKAR2B, MAPK14, PRKCI, PAK3, PAK2, PRKAG2, MAP3K8, MAP3K3, PRKAR1A, PRKCB</i>                                                                       |

|    |                                |       |      |                                                                                                                                                                                                                                                                                                                                                                                                                                                                                                                                                                                                                                                                                                                                                                             |
|----|--------------------------------|-------|------|-----------------------------------------------------------------------------------------------------------------------------------------------------------------------------------------------------------------------------------------------------------------------------------------------------------------------------------------------------------------------------------------------------------------------------------------------------------------------------------------------------------------------------------------------------------------------------------------------------------------------------------------------------------------------------------------------------------------------------------------------------------------------------|
| 6  | RANK signaling in osteoclasts  | 52.00 | 0.65 | <i>MAP2K4, RAF1, MAP3K15, MAP3K11, MAPK1, PIK3R1, MAPK13, MAP3K4, PIK3R4, IKBKB, MAP3K10, IKBKG, MAP2K2, MAPK3, PIK3CG, MAP3K7, ATM, MAP3K2, PIK3C2B, MAP3K14, MAP3K9, AKT2, MAP3K13, MAPK12, TRAF6, PIK3R3, MAP3K12, MAPK10, PIK3CD, MAP2K6, RELA, PIK3CA, CAMK4, PTK2B, PIK3R5, MAP3K5, MAPK11, AKT1, PIK3C3, AKT3, PIK3R2, CHUK, MAP2K1, SRC, MAP2K7, PIK3C2A, MAP3K6, MAP3K1, PIK3C2G, MAPK8, MAPK9, IKBKE, CALM1, MAPK14, MAP3K8, PIK3CB, MAP3K3</i>                                                                                                                                                                                                                                                                                                                   |
| 7  | HGF signaling                  | 51.80 | 0.58 | <i>MAP2K4, MAP3K15, RAF1, MAP3K11, MAPK1, PIK3R1, MAP3K4, PIK3R4, PTK2, MAP3K10, PAK1, MAP2K2, MAPK3, PIK3CG, MAP3K7, PRKD3, PRKD1, ATM, MAP3K2, PIK3C2B, MAP3K14, MAP3K9, AKT2, PRKCQ, CRKL, MAP3K13, RAC1, MAPK12, MET, PIK3R3, MAP3K12, PRKCD, MAPK10, PIK3CD, PRKCH, CDK2, PIK3CA, PIK3R5, MAP3K5, PRKCZ, AKT1, PIK3C3, AKT3, PRKCE, PIK3R2, MAP2K1, PRKCA, MAP2K7, MAP3K6, PIK3C2A, MAP3K1, PIK3C2G, MAPK8, MAPK9, PRKCG, PRKCI, CDKN1A, MAP3K8, PIK3CB, MAP3K3, PRKCB</i>                                                                                                                                                                                                                                                                                             |
| 8  | ErbB signaling                 | 50.60 | 0.65 | <i>MAP2K4, RAF1, MAPK1, PIK3R1, PDPK1, MAPK13, PIK3R4, PAK1, MAP2K2, PIK3CG, MAPK3, GSK3B, PRKD3, PRKD1, ATM, PIK3C2B, RPS6KB1, PRKCQ, MAPK12, PIK3R3, PRKCD, MAPK10, PRKCH, PIK3CD, PAK7, MAP2K3, MAP2K6, PIK3CA, PIK3R5, MAPK11, PRKCZ, MTOR, AKT1, ERBB4, PIK3C3, PRKCE, ERBB2, PIK3R2, MAP2K1, EGFR, PRKCA, PAK4, PIK3C2A, PAK6, MAPK8, PIK3C2G, MAPK9, ERBB3, PRKCG, MAPK14, PRKCI, PAK3, NRG3, PAK2, PIK3CB, PRKCB</i>                                                                                                                                                                                                                                                                                                                                                |
| 9  | PTEN signaling                 | 49.90 | 0.53 | <i>RAF1, TGFBR1, MAPK1, TGFBR3, PIK3R1, PDPK1 GSK3A, BMPR1B, TGFBR2, FGFR3, PTK2, IKBKB, IKBKG, MAP2K2, MAPK3, FGFR4, PIK3CG, CSNK2A1, GSK3B, PDGFRB, RPS6KB1, AKT2, FGFR1, RAC1, FGFR2, DDR1, PIK3R3, PIK3CD, FGFRL1, INSR, MAGI3, MAST2, RELA, PIK3CA, ILK, PIK3R5, BMPR2, PRKCZ, AKT1, BMPR1A, NTRK1, PDGFRA, IGF1R, RPS6KB2, AKT3, PIK3R2, CHUK, CSNK2B, MAP2K1, EGFR, FLT1, FLT4, IKBKE, IGF2R, CSNK2A2, MAGI1, NTRK2, NTRK3, CDKN1A, PIK3CB, CDKN1B, KDR, MAGI2</i>                                                                                                                                                                                                                                                                                                   |
| 10 | Molecular mechanisms of cancer | 49.80 | 0.28 | <i>RAF1, TGFBR1, SUV39H1, PIK3R1, CDKN2C, GSK3A, BMPR1B, MAPK13, PAK1, CAMK2A, PIK3CG, HIPK2, PRKD3, PRKD1, ATM, PIK3C2B, AKT2, PRKCQ, STK36, CDK7, PRKACA, PIK3CD, PAK7, MAP2K3, CAMK2G, MAP2K6, FYN, PIK3CA, CDK4, BMPR2, JAK2, MAP3K5, PRKCZ, CHEK1, AKT1, PIK3C3, PRKCE, PIK3R2, CAMK2B, PRKDC, PIK3C2G, MAPK8, SIN3A, PRKCG, CDKN2D, PAK3, CDKN1A, JAK3, PRKCB, PRKACB, MAP2K4, JAK1, MAPK1, PIK3R4, TGFBR2, PTK2, CAMK2D, MAP2K2, MAPK3, MAP3K7, GSK3B, TAB1, TYK2, RAC1, CDK6, AURKA, MAPK12, PIK3R3, PRKCD, PRKACG, MAPK10, PRKCH, CDK2, RELA, PIK3R5, ABL1, CDKN2B, MAPK11, PRKAG1, BRAF, NLK, CDK5, BMPR1A, PRKAR1B, AKT3, MAP2K1, CHEK2, PRKCA, SRC, PAK4, PIK3C2A, PAK6, PRKAR2A, MAPK9, PRKAR2B, PRKCI, MAPK14, PAK2, PRKAG2, ATR, PIK3CB, CDKN1B, PRKAR1A</i> |



**Supplementary Table S4: Top 10 disease and biological function networks identified by siRNA screen using the HIF-1 $\alpha$ -NanoLuc assay**

| Rank | Top Disease and Functions                                                                    | Score<br>-log ( <i>p</i> -value) | Focus<br>Molecules | Molecules in Network                                                                                                                                                                                                                                                                                                                                    |
|------|----------------------------------------------------------------------------------------------|----------------------------------|--------------------|---------------------------------------------------------------------------------------------------------------------------------------------------------------------------------------------------------------------------------------------------------------------------------------------------------------------------------------------------------|
| 1    | RNA post-transcriptional modification, post-translational modification, cancer               | 51                               | 34                 | <i>CDK11B, DSTYK, DYRK1A, MAPK3, Mi2, MPND, MST4, PAN2, PCBP1, PIM3, PNKP, PRKDC, PRPF8, PRPF4B, RYK, SF3B2, SMARCAD1, SMG1, SRPK1, SRPK2, SRPK3, SRSF1, SRSF2, SRSF3, STK24, STK25, TMPRSS2, TRIM23, TRIM27, TRIM32, UBE2K, URM1, USP30, USP36, ZRSR2</i>                                                                                              |
| 2    | Cancer, gastrointestinal disease, post-translational modification                            | 45                               | 32                 | <i>BRSK1, BRSK2, DUB, INSRR, JOSD1, MARK1, MARK2, MARK3, MLKL, NF<math>\kappa</math>B, NUA2, OTUB2, peptidase, PKN3, RIOK3, RIPK4, STK10, STRADA, STRADB, TAOK1, UHMK1, USP21, USP26, USP28, USP29, USP31, USP34, USP35, USP38, USP40, USP43, USP51, USP27X, USP9Y, USPL1</i>                                                                           |
| 3    | Cancer, organismal development, cell death and survival                                      | 40                               | 30                 | <i>ADCK5, caspase, CDK4, CDK17, CDK11A, DLG4, GCK, GNRH, GRK5, HIPK1, Histone H4, MAGI2, MAPK7, MAPK8, MAPK9, MKK6/7, Nos, NRK, PAK1, PCDH15, PCLO, PDK2, PRKCE, SLAH1, SMYD5, SRP72, STK3, STK4, SUV420H2, TBCK, THNSL1, TRIM33, UBE2I, USP47, VRK1</i>                                                                                                |
| 4    | Post-translational modification, protein degradation, protein synthesis                      | 40                               | 30                 | <i>20s proteasome, <math>\alpha</math>-catenin, BAP, BRCC, Calmodulin, CLK, DAPK, F-actin, PKN2, PSMA3, PSMD14, Spectrin, SPTA1, STK33, UCHL1, UCHL5, UFD1L, USP1, USP5, USP6, USP7, USP8, USP11, USP12, USP13, USP14, USP15, USP19, USP20, USP22, USP32, USP39, USP46, USP9X, YOD1</i>                                                                 |
| 5    | Carbohydrate metabolism, lipid metabolism, small molecule biochemistry                       | 36                               | 28                 | <i>15-LOX, AGK, CLK1, CLK4, COL4A3BP, CSNK1G2, EGFR, GAD, GAK, Grb2-Shc1-Sos, MAST1, PDK3, Phosphatidylinositol4,5 kinase, PI4K, PI4K2A, PI4K2B, PI4KA, PI4KB, PI4P5K, PIKFYVE, PIP4K2A, PIP4K2B, PIP4K2C, PIP5K1A, PIP5K1B, PIP5K1C, PIP5K1L, PKC alpha/beta, PXX, RIOK1, ROR1, ROS1, STAMBP, STAMBPL1, UBL5</i>                                       |
| 6    | Post-translational modification, cell-to-cell signaling and interaction, molecular transport | 35                               | 28                 | <i>7S NGF, AATK, AKT2, ARAF, CDC42BPA, Cofilin, CSNK1A1, ENaC, FXN, GRK4, Limk, LIMK1, LIMK2, MAP2K6, MAP4K2, MTORC2, OXSRI, P38 MAPK, PAK2, PAK3, PAK4, PASK, PDK1, PKN1, PRKCH, PRKCQ, SGK1, STK39, TESK1, tubulin, WNK1, WNK2, WNK3, WNK4, ZMYND8</i>                                                                                                |
| 7    | Post-translational modification, cancer, gastrointestinal disease                            | 34                               | 27                 | <i>AMHR2, BMPR2, BMPR1A, BMPR1B, Collagen type III, Collagen type IV, DDR1, FGFR1, FGFR2, FGFR3, FGFR4, FGFRL1, FLT1, FLT4, IGF1R, IGF2R, KDR, Laminin1, NME2, NME3, NTRK1, Patched, PDGF Ab, PDGFRA, PDGFRB, PKC (<math>\alpha, \epsilon, \theta</math>), PLC gamma, SIRT6, SLC16A2, STK35, TGFBR1, TGFBR2, Type I /Type II receptor, USP10, USP50</i> |

|    |                                                                                          |    |    |                                                                                                                                                                                                                                                                                             |
|----|------------------------------------------------------------------------------------------|----|----|---------------------------------------------------------------------------------------------------------------------------------------------------------------------------------------------------------------------------------------------------------------------------------------------|
| 8  | Post-translational modification, cellular development, cellular growth and proliferation | 34 | 27 | <i>ABL1, BRD2, CALM1, CAMKV, CDK10, CK2, CSNK2A1, CSNK2A2, cytochrome C, EXOSC10, HIPK4, Histone H3, IL1, IL12, INSR, MTOR, NMDA Receptor, PCDHA12, PRKACA, PRKACB, RAB37, RAF1, RNA polymerase II, SIN3A, SIRT7, SMARCA5, TET1, TET2, tubulin, ULK2, USP3, USP24, USP44, USP49, ZNF781</i> |
| 9  | Post-translational modification, cell cycle, DNA replication, recombination, and repair  | 33 | 28 | <i>APC, AURK, AURKA, AURKB, AURKC, BMP2K, BUB1, BUB1B, CDC25, CHEK2, CMPK1, DBF4, DTYMK, GSG2, MELK, NAGK, NEK3, NEK6, NEK7, NEK9, PDE4, PKDCC, PLK, PLK1, PLK2, PLK3, PLK4, SNRK, STK16, UCK1, UCK2, UCKL1, uridine kinase, VEGF, XIRP2</i>                                                |
| 10 | Post-translational modification, cancer, gastrointestinal disease                        | 30 | 25 | <i>ACVR1C, CAMK2N1, CKS2, EIF2AK4, Eph Receptor, EPHA7, EPHA10, ERK, ETS, GK, KSRI, KSR2, MAGI, MAGI3, MAPK4, MAPK12, MAPK15, MAPK kinase, MAPKAPK3, MAPKAPK2/3, MATK, MKNK1, MKNK2, MLK, PDK4, PEA1, PRKG2, RhoGap, SGK223, SMAD1/5, SULF1, TMSB4, TRIB1, VRK2, ZNF267</i>                 |

**Supplementary Table S5: Top 20 genes up-regulated by siRNA oligos, measured by HIF-1 $\alpha$ -NanoLuc assay**

| Rank | GenBank ID   | Symbol          | Gene Name                                                          | Activation %*<br>HIF-1 $\alpha$ -NanoLuc<br>(n = 3) | Cell Viability %<br>(n = 1) | Networks<br>in IPA |
|------|--------------|-----------------|--------------------------------------------------------------------|-----------------------------------------------------|-----------------------------|--------------------|
| 1    | NM_012241    | <i>SIRT5</i>    | Sirtuin 5                                                          | 194 $\pm$ 37                                        | 90                          | N/A                |
| 2    | NM_032435    | <i>KIAA1804</i> | Mixed lineage kinase 4                                             | 188 $\pm$ 16                                        | 115                         | 13                 |
| 3    | NM_020730    | <i>DLG3</i>     | Discs, large homolog 3 (Drosophila)                                | 180 $\pm$ 16                                        | 117                         | 12                 |
| 4    | NM_002019    | <i>FLT1</i>     | Fms-related tyrosine kinase 1                                      | 172 $\pm$ 5                                         | 124                         | 7                  |
| 5    | NM_014975    | <i>MAST1</i>    | Microtubule associated serine/<br>threonine kinase 1               | 167 $\pm$ 17                                        | 114                         | 5                  |
| 6    | NM_007170    | <i>TESK2</i>    | Testis-specific kinase 2                                           | 166 $\pm$ 16                                        | 131                         | N/A                |
| 7    | NM_001715    | <i>BLK</i>      | B lymphoid tyrosine kinase                                         | 163 $\pm$ 10                                        | 97                          | 11                 |
| 8    | NM_006282    | <i>STK4</i>     | Serine/threonine kinase 4                                          | 163 $\pm$ 24                                        | 102                         | 3                  |
| 9    | NM_001005915 | <i>ERBB3</i>    | v-erb-b2 avian erythroblastic leukemia<br>viral oncogene homolog 3 | 161 $\pm$ 5                                         | 96                          | 15                 |
| 10   | NM_182691    | <i>SRPK2</i>    | SRSF protein kinase 2                                              | 160 $\pm$ 5                                         | 97                          | 1                  |
| 11   | NM_001006943 | <i>EPHA8</i>    | EPH receptor A8                                                    | 159 $\pm$ 23                                        | 68                          | N/A                |
| 12   | NM_005009    | <i>NME4</i>     | NME/NM23 nucleoside diphosphate<br>kinase 4                        | 158 $\pm$ 4                                         | 110                         | 15                 |
| 13   | NM_012240    | <i>SIRT4</i>    | Sirtuin 4                                                          | 156 $\pm$ 51                                        | 65                          | N/A                |
| 14   | NM_020903    | <i>USP29</i>    | Ubiquitin specific peptidase 29                                    | 153 $\pm$ 32                                        | 96                          | 2                  |
| 15   | NM_138316    | <i>PANK1</i>    | Pantothenate kinase 1                                              | 153 $\pm$ 38                                        | 63                          | 15                 |
| 16   | NM_001656    | <i>TRIM23</i>   | Tripartite motif containing 23                                     | 153 $\pm$ 12                                        | 76                          | 1                  |
| 17   | NM_020630    | <i>RET</i>      | Ret proto-oncogene                                                 | 152 $\pm$ 8                                         | 101                         | 11                 |
| 18   | NM_004614    | <i>TK2</i>      | Thymidine kinase 2, mitochondrial                                  | 147 $\pm$ 11                                        | 97                          | N/A                |
| 19   | NM_004936    | <i>CDKN2B</i>   | Cyclin-dependent kinase inhibitor 2B                               | 143 $\pm$ 8                                         | 100                         | N/A                |
| 20   | NM_004563    | <i>PCK2</i>     | Phosphoenolpyruvate carboxykinase                                  | 141 $\pm$ 31                                        | 105                         | N/A                |

\*The HIF-1 $\alpha$ -NanoLuc intensity values of each siRNA experiment were normalized to a positive transfection control (full inhibition; 0% HIF-1 $\alpha$ -NanoLuc activity) and a non-targeting reference (no activation/inhibition; 100% HIF-1 $\alpha$ -NanoLuc activity).



**Supplementary Table S6: Top 20 genes down-regulated by siRNA oligos, measured by HIF-1 $\alpha$ -NanoLuc assay**

| Rank | GenBank ID   | Symbol         | Gene Name                                                                     | Activation %*<br>HIF-1 $\alpha$ -NanoLuc<br>(n = 3) | Cell<br>Number %<br>(n = 1) | Networks<br>in IPA |
|------|--------------|----------------|-------------------------------------------------------------------------------|-----------------------------------------------------|-----------------------------|--------------------|
| 1    | NM_002645    | <i>PIK3C2A</i> | phosphatidylinositol-4-phosphate 3-kinase, catalytic subunit type 2 alpha     | 4 $\pm$ 1                                           | 33                          | N/A                |
| 2    | NM_006842    | <i>SF3B2</i>   | splicing factor 3b, subunit 2, 145kDa                                         | 4 $\pm$ 1                                           | 23                          | 1                  |
| 3    | NM_002005    | <i>FES</i>     | feline sarcoma oncogene                                                       | 4 $\pm$ 1                                           | 51                          | 19                 |
| 4    | NM_015000    | <i>STK38L</i>  | serine/threonine kinase 38 like                                               | 5 $\pm$ 0                                           | 66                          | N/A                |
| 5    | NM_173655    | <i>EPHA6</i>   | EPH receptor A6                                                               | 5 $\pm$ 0                                           | 46                          | 18                 |
| 6    | NM_001015879 | <i>AURKC</i>   | aurora kinase C                                                               | 5 $\pm$ 1                                           | 51                          | 9                  |
| 7    | NM_198437    | <i>AURKA</i>   | aurora kinase A                                                               | 5 $\pm$ 1                                           | 53                          | 9                  |
| 8    | NM_138554    | <i>TLR4</i>    | toll-like receptor 4                                                          | 5 $\pm$ 2                                           | 27                          | N/A                |
| 9    | NM_001932    | <i>MPP3</i>    | membrane protein, palmitoylated 3 (MAGUK p55 subfamily member 3)              | 5 $\pm$ 1                                           | 47                          | 12                 |
| 10   | NM_000141    | <i>FGFR2</i>   | fibroblast growth factor receptor 2                                           | 5 $\pm$ 1                                           | 51                          | 7                  |
| 11   | NM_002596    | <i>CDK18</i>   | cyclin-dependent kinase 18                                                    | 5 $\pm$ 0                                           | 55                          | 14                 |
| 12   | NM_007199    | <i>IRAK3</i>   | interleukin-1 receptor-associated kinase 3                                    | 6 $\pm$ 2                                           | 58                          | 20                 |
| 13   | NM_001024644 | <i>XCRI</i>    | chemokine (C motif) receptor 1                                                | 6 $\pm$ 1                                           | 48                          | N/A                |
| 14   | NM_130901    | <i>OTUD7A</i>  | OTU deubiquitinase 7A                                                         | 6 $\pm$ 2                                           | 23                          | N/A                |
| 15   | NM_017431    | <i>PRKAG3</i>  | protein kinase, AMP-activated, gamma 3 non-catalytic subunit                  | 7 $\pm$ 1                                           | 27                          | 16                 |
| 16   | NM_007125    | <i>UTY</i>     | ubiquitously transcribed tetratricopeptide repeat containing, Y-linked        | 7 $\pm$ 2                                           | 22                          | N/A                |
| 17   | NM_006445    | <i>PRPF8</i>   | pre-mRNA processing factor 8                                                  | 7 $\pm$ 2                                           | 32                          | 1                  |
| 18   | NM_000291    | <i>PGKI</i>    | phosphoglycerate kinase 1                                                     | 7 $\pm$ 1                                           | 64                          | 24                 |
| 19   | NM_014002    | <i>IKBKE</i>   | inhibitor of kappa light polypeptide gene enhancer in B-cells, kinase epsilon | 7 $\pm$ 1                                           | 52                          | N/A                |
| 20   | NM_014586    | <i>HUNK</i>    | hormonally up-regulated Neu-associated kinase                                 | 8 $\pm$ 0                                           | 52                          | N/A                |

**Supplementary Table S7: Primary and confirmatory screening data of selected HIF-1 $\alpha$ -NanoLuc inhibitor hits**

| Compound Name       | HIF-1 $\alpha$ -NanoLuc primary IC <sub>50</sub> , $\mu$ M (Efficacy, %) | HIF-1 $\alpha$ -NanoLuc confirmatory IC <sub>50</sub> , $\mu$ M (Efficacy, %) | Viability (Luc) confirmatory IC <sub>50</sub> , $\mu$ M (Efficacy, %) | HRE-bla confirmatory IC <sub>50</sub> , $\mu$ M (Efficacy, %) | Viability (BLA) confirmatory IC <sub>50</sub> , $\mu$ M (Efficacy, %) | Description                                                                       |
|---------------------|--------------------------------------------------------------------------|-------------------------------------------------------------------------------|-----------------------------------------------------------------------|---------------------------------------------------------------|-----------------------------------------------------------------------|-----------------------------------------------------------------------------------|
| Actinomycin D       | 0.04 (99)                                                                | 0.03 $\pm$ 0.01 (87 $\pm$ 4)                                                  | Inactive                                                              | 0.02 $\pm$ 0.00 (78 $\pm$ 5)                                  | 1.52 $\pm$ 2.33 (50 $\pm$ 22)                                         | Transcription inhibitor.                                                          |
| AGK2                | N/A                                                                      | 19.50 $\pm$ 2.49 (107 $\pm$ 9)                                                | 21.20 $\pm$ 3.96 (82 $\pm$ 3.96)                                      | 9.47 $\pm$ 3.45 (63 $\pm$ 14)                                 | 10.08 $\pm$ 2.97 (61 $\pm$ 13)                                        | SIRT inhibitor.                                                                   |
| Alexidine           | 10.59 (126)                                                              | 9.35 $\pm$ 0.00 (107 $\pm$ 2)                                                 | 18.89 $\pm$ 3.53 (115 $\pm$ 3)                                        | 8.78 $\pm$ 1.12 (87 $\pm$ 18)                                 | 8.83 $\pm$ 1.59 (102 $\pm$ 5)                                         | Anti-microbial.                                                                   |
| AMI-193 (Spiramide) | 3.35 (57)                                                                | 12.25 $\pm$ 0.83 (48 $\pm$ 6)                                                 | Inactive                                                              | Inactive                                                      | 25.84 $\pm$ 4.40 (32 $\pm$ 12)                                        | 5-HT <sub>2A</sub> , 5-HT <sub>1A</sub> , and D <sub>2</sub> receptor antagonist. |
| 5-Azacitidine       | 2.11 (122)                                                               | 1.49 $\pm$ 0.17 (98 $\pm$ 4)                                                  | Inactive                                                              | 11.01 $\pm$ 0.75 (94 $\pm$ 2)                                 | Inactive                                                              | Cytidine analog. Drug to treat myelodysplastic syndrome.                          |
| Azathioprine        | 3.42 (67)                                                                | 8.07 $\pm$ 1.82 (50 $\pm$ 11)                                                 | 2.11 $\pm$ 0.53 (51 $\pm$ 4)                                          | Inactive                                                      | Inactive                                                              | Anti-metabolite. Immunosuppressant.                                               |
| Bisacodyl           | 0.84 (110)                                                               | 3.91 $\pm$ 0.70 (26 $\pm$ 6)                                                  | Inactive                                                              | 0.84 $\pm$ 0.10 (93 $\pm$ 4)                                  | 0.69 $\pm$ 0.05 (82 $\pm$ 3)                                          | Laxative drug.                                                                    |
| Camptothecin        | N/A                                                                      | 0.57 $\pm$ 0.04 (102 $\pm$ 5)                                                 | Inactive                                                              | 0.20 $\pm$ 0.06 (84 $\pm$ 1)                                  | Inactive                                                              | Topoisomerase I inhibitor.                                                        |
| Canertinib          | 2.37 (50)                                                                | 28.84 $\pm$ 10.72 (88 $\pm$ 20)                                               | Inactive                                                              | 4.67 $\pm$ 7.50 (37 $\pm$ 22)                                 | 21.21 $\pm$ 2.44 (105 $\pm$ 6)                                        | EGFR inhibitor.                                                                   |
| Cloflucarban        | 7.50 (66)                                                                | 14.28 $\pm$ 0.93 (98 $\pm$ 4)                                                 | Inactive                                                              | 6.80 $\pm$ 1.55 (98 $\pm$ 1)                                  | 22.94 $\pm$ 3.16 (106 $\pm$ 9)                                        | Antiseptic.                                                                       |
| Cycloheximide       | 0.24 (92)                                                                | 0.53 $\pm$ 0.00 (104 $\pm$ 5)                                                 | Inactive                                                              | 1.06 $\pm$ 0.12 (92 $\pm$ 2)                                  | 8.34 $\pm$ 4.61 (44 $\pm$ 15)                                         | Protein synthesis inhibitor.                                                      |
| Cyclosporine A      | 11.88 (87)                                                               | 17.38 $\pm$ 2.22 (91 $\pm$ 5)                                                 | Inactive                                                              | 10.63 $\pm$ 1.22 (51 $\pm$ 3)                                 | Inactive                                                              | Immunosuppressant.                                                                |
| Dabrafenib          | N/A                                                                      | 0.47 $\pm$ 0.24 (26 $\pm$ 13)                                                 | Inactive                                                              | 6.40 $\pm$ 1.55 (43 $\pm$ 1)                                  | Inactive                                                              | B-Raf inhibitor.                                                                  |
| Dasatinib           | 21.13 (56)                                                               | 23.58 $\pm$ 8.59 (46 $\pm$ 3)                                                 | Inactive                                                              | 0.03 $\pm$ 0.02 (52 $\pm$ 11)                                 | Inactive                                                              | SRC/ABL inhibitor.                                                                |
| Daunorubicin        | 0.75 (51)                                                                | 1.96 $\pm$ 0.35 (98 $\pm$ 8)                                                  | Inactive                                                              | 1.00 $\pm$ 0.44 (80 $\pm$ 5)                                  | 3.28 $\pm$ 1.23 (75 $\pm$ 13)                                         | DNA intercalator and topoisomerase I inhibitor.                                   |
| Deslanoside         | 0.30 (115)                                                               | 0.39 $\pm$ 0.03 (108 $\pm$ 9)                                                 | Inactive                                                              | 0.16 $\pm$ 0.03 (102 $\pm$ 3)                                 | 0.32 $\pm$ 0.09 (86 $\pm$ 9)                                          | Na <sup>+</sup> /K <sup>+</sup> pump blocker.                                     |
| Digitoxin           | 0.03 (124)                                                               | 0.11 $\pm$ 0.01 (101 $\pm$ 1)                                                 | Inactive                                                              | 0.03 $\pm$ .01 (97 $\pm$ 0)                                   | 0.09 $\pm$ 0.03 (91 $\pm$ 4)                                          | Na <sup>+</sup> /K <sup>+</sup> pump blocker.                                     |
| Diphenoxylate       | 16.79 (82)                                                               | 13.74 $\pm$ 0.93 (104 $\pm$ 12)                                               | Inactive                                                              | 7.80 $\pm$ 0.53 (60 $\pm$ 4)                                  | Inactive                                                              | Centrally-active opioid drug.                                                     |
| Emetine             | 0.19 (136)                                                               | 0.30 $\pm$ 0.08 (106 $\pm$ 1)                                                 | Inactive                                                              | 0.29 $\pm$ 0.05 (91 $\pm$ 1)                                  | Inactive                                                              | Anti-protozoal and a drug to induce vomiting.                                     |

|                       |                |                            |                          |                            |                            |                                                                     |
|-----------------------|----------------|----------------------------|--------------------------|----------------------------|----------------------------|---------------------------------------------------------------------|
| Erlotinib             | 2.66 (33)      | 6.64 ± 2.42<br>(35 ± 6)    | Inactive                 | 7.95 ± 3.47<br>(59 ± 15)   | Inactive                   | EGFR inhibitor.                                                     |
| Ethaverine            | 6.68 (67)      | 9.39 ± 1.08<br>(96 ± 2)    | Inactive                 | Inactive                   | Inactive                   | Calcium channel blocker. Drug to treat peripheral vascular disease. |
| Fanetizole            | 26.60<br>(123) | 16.36 ± 3.97<br>(28 ± 5)   | Inactive                 | Inactive                   | Inactive                   | Immunomodulatory agent.                                             |
| Gefitinib             | 0.19 (86)      | 19.41 ± 1.31<br>(31 ± 3)   | Inactive                 | 11.38 ± 9.73<br>(45 ± 14)  | Inactive                   | EGFR inhibitor.                                                     |
| Lapatinib             | 33.49 (56)     | 20.17 ± 1.31<br>(50 ± 6)   | Inactive                 | 11.44 ± 0.75<br>(78 ± 6)   | 20.35 ± 1.33<br>(95 ± 7)   | EGFR inhibitor.                                                     |
| Leflunomide           | 4.22 (60)      | 11.81 ± 6.00<br>(42 ± 10)  | Inactive                 | Inactive                   | Inactive                   | Pyrimidine synthesis inhibitor.                                     |
| LY-294002             | N/A            | 14.58 ± 3.54<br>(50 ± 9)   | Inactive                 | 12.03 ± 2.25<br>(35 ± 8)   | Inactive                   | PI3K inhibitor.                                                     |
| MitMAB                | 2.11 (129)     | 15.25 ± 7.16<br>(99 ± 9)   | Inactive                 | 5.73 ± 1.88<br>(100 ± 5)   | 18.22 ± 2.51<br>(57 ± 3)   | Dynamin inhibitor.                                                  |
| Mitoxantrone          | 2.38 (80)      | 7.65 ± 2.13<br>(110 ± 5)   | Inactive                 | 0.86 ± 0.52<br>(99 ± 10)   | 13.38 ± 4.40<br>(119 ± 11) | Topoisomerase I inhibitor.                                          |
| Mycophenolate mofetil | 0.33 (61)      | 1.58 ± 0.45<br>(59 ± 5)    | Inactive                 | 0.21 ± 0.05<br>(58 ± 4)    | 0.53 ± 0.00<br>(26 ± 5)    | Inosine monophosphate dehydrogenase inhibitor.                      |
| Naftopidil            | 7.50 (65)      | 9.71 ± 6.34<br>(43 ± 11)   | Inactive                 | Inactive                   | Inactive                   | Alpha blocker. Anti-hypertensive drug.                              |
| Niclosamide           | 0.37 (115)     | 1.59 ± 0.40<br>(96 ± 5)    | 2.95 ± 01.93<br>(38 ± 4) | 1.67 ± 0.46<br>(84 ± 6)    | 1.63 ± 2.58<br>(37 ± 9)    | Anthelmintic.                                                       |
| Nitazoxanide          | 9.44 (150)     | 17.30 ± 1.17<br>(101 ± 14) | 9.39 ± 1.08<br>(44 ± 3)  | 3.00 ± 0.34<br>(88 ± 1)    | 3.00 ± 0.34<br>(88 ± 1)    | Anti-protozoal.                                                     |
| Ouabain               | 0.08 (130)     | 0.14 ± 0.01<br>(100 ± 2)   | Inactive                 | 0.08 ± 0.01<br>(94 ± 4)    | 0.13 ± 0.00<br>(81 ± 3)    | Na <sup>+</sup> /K <sup>+</sup> pump blocker.                       |
| Oxyphenisatin acetate | 1.33 (84)      | 2.47 ± 0.79<br>(55 ± 9)    | Inactive                 | 0.19 ± 0.01<br>(92 ± 3)    | 0.20 ± 0.01<br>(77 ± 5)    | Laxative.                                                           |
| PD-184352             | 0.84 (64)      | 13.74 ± 0.93<br>(99 ± 2)   | Inactive                 | 5.98 ± 0.69<br>(74 ± 5)    | 5.93 ± 4.08<br>(32 ± 9)    | MEK inhibitor.                                                      |
| PI-103                | N/A            | 0.92 ± 0.06<br>(57 ± 10)   | Inactive                 | 0.15 ± 0.02<br>(62 ± 3)    | 0.77 ± 0.25<br>(32 ± 5)    | mTOR inhibitor.                                                     |
| PP-242                | 0.75 (115)     | 2.05 ± 1.12<br>(90 ± 11)   | Inactive                 | 0.05 ± 0.02<br>(56 ± 6)    | 15.05 ± 2.44<br>(36 ± 3)   | mTOR inhibitor.                                                     |
| Proscillaridin A      | 0.01 (101)     | 0.01 ± 0.00<br>(103 ± 3)   | Inactive                 | 0.01 ± 0.00<br>(93 ± 3)    | 0.02 ± 0.00<br>(86 ± 6)    | Na <sup>+</sup> /K <sup>+</sup> pump blocker.                       |
| Quercetine            | 0.84 (44)      | 37.22 ± 0.00<br>(37 ± 1)   | Inactive                 | 12.84 ± 0.84<br>(84 ± 10)  | Inactive                   | HDAC inhibitor.                                                     |
| Selumetinib           | 0.04 (62)      | 1.49 ± 1.30<br>(48 ± 10)   | Inactive                 | Inactive                   | Inactive                   | MEK inhibitor.                                                      |
| Sorafenib             | 13.33<br>(156) | 23.59 ± 2.71<br>(100 ± 6)  | Inactive                 | 17.59 ± 8.60<br>(98 ± 7)   | Inactive                   | VEGFR/PDGFR/Raf inhibitor.                                          |
| SU-5416               | 23.71 (67)     | 12.23 ± 7.55<br>(57 ± 22)  | Inactive                 | 12.84 ± 0.84<br>(111 ± 12) | Inactive                   | VEGFR inhibitor.                                                    |

|                         |           |                           |                          |                           |                            |                                             |
|-------------------------|-----------|---------------------------|--------------------------|---------------------------|----------------------------|---------------------------------------------|
| Sunitinib               | 1.68 (60) | 11.34 ± 3.71<br>(80 ± 15) | 26.36 ± 9.41<br>(26 ± 7) | 16.99 ± 3.17<br>(81 ± 32) | 15.98 ± 8.13<br>(60 ± 38)  | VEGFR inhibitor.                            |
| Temsirolimus            | N/A       | 34.52 ± 2.34<br>(92 ± 8)  | Inactive                 | 15.86 ± 6.91<br>(86 ± 7)  | 27.66 ± 1.87<br>(116 ± 11) | mTOR inhibitor.                             |
| 6-Thioguanine<br>(6-TG) | 2.11 (81) | 3.26 ± 0.81<br>(81 ± 7)   | 2.30 ± 0.87<br>(57 ± 2)  | 7.83 ± 1.00<br>(88 ± 1)   | Inactive                   | Anti-metabolite. Drug<br>to treat leukemia. |
| Topotecan               | 6.68 (98) | 2.10 ± 0.24<br>(99 ± 6)   | Inactive                 | 0.62 ± 0.38<br>(131 ± 9)  | Inactive                   | Topoisomerase I<br>inhibitor.               |
| Trametinib              | N/A       | 2.98 ± 4.64<br>(69 ± 5)   | Inactive                 | 20.51 ± 8.11<br>(53 ± 9)  | Inactive                   | MEK inhibitor.                              |
| Trichostatin A          | N/A       | 0.67 ± 0.26<br>(55 ± 4)   | Inactive                 | 12.19 ± 3.90<br>(92 ± 11) | 9.68 ± 3.79<br>(43 ± 13)   | HDAC inhibitor.                             |
| Vemurafenib             | N/A       | 13.59 ± 6.38<br>(66 ± 6)  | Inactive                 | 4.10 ± 0.70<br>(75 ± 11)  | 15.98 ± 8.13<br>(27 ± 10)  | B-Raf inhibitor.                            |
| Wortmannin              | N/A       | 0.99 ± 0.22<br>(71 ± 4)   | Inactive                 | 0.57 ± 0.17<br>(91 ± 8)   | 11.41 ± 4.79<br>(47 ± 11)  | PI3K inhibitor.                             |

**Supplementary Table S8: Cancer cell proliferation data of selected HIF-1 $\alpha$ -NanoLuc inhibitors**

| Compound Name         | HCT116<br>3-Day Viability<br>IC <sub>50</sub> , $\mu$ M<br>(Efficacy, %) | ME-180<br>3-Day Viability<br>IC <sub>50</sub> , $\mu$ M<br>(Efficacy, %) | HIF-1 $\alpha$ -NanoLuc<br>Activity/HCT116<br>3-Day Viability | HIF-1 $\alpha$ -NanoLuc<br>Activity/ME-180<br>3-Day Viability |
|-----------------------|--------------------------------------------------------------------------|--------------------------------------------------------------------------|---------------------------------------------------------------|---------------------------------------------------------------|
| 5-Azacytidine         | 13.27 ± 1.52 (90 ± 9)                                                    | 18.65 ± 0.00 (51 ± 12)                                                   | 0.1                                                           | 0.08                                                          |
| Camptothecin          | 1.00 ± 0.29 (59 ± 9)                                                     | 0.04 ± 0.00 (100 ± 2)                                                    | 1.5                                                           | 14                                                            |
| Daunorubicin          | 2.43 ± 1.40 (79 ± 28)                                                    | 0.17 ± 0.08 (101 ± 4)                                                    | 0.8                                                           | 0.8                                                           |
| Deslanoside           | 2.59 ± 2.87 (63 ± 8)                                                     | 0.31 ± 0.04 (97 ± 3)                                                     | 0.2                                                           | 12                                                            |
| Digitoxin             | 2.29 ± 3.13 (97 ± 8)                                                     | 0.09 ± 0.02 (101 ± 4)                                                    | 0.05                                                          | 1.2                                                           |
| LY-294002             | Inactive                                                                 | 15.42 ± 1.04 (73 ± 4)                                                    | N/A                                                           | 0.9                                                           |
| Mitoxantrone          | 11.10 ± 4.79 (80 ± 5)                                                    | 0.11 ± 0.03 (97 ± 4)                                                     | 0.7                                                           | 69                                                            |
| Mycophenolate mofetil | Inactive                                                                 | 1.82 ± 0.74 (81 ± 3)                                                     | N/A                                                           | 0.9                                                           |
| Niclosamide           | 1.67 ± 0.46 (83 ± 6)                                                     | 2.04 ± 0.00 (86 ± 1)                                                     | 1.0                                                           | 0.8                                                           |
| Ouabain               | 0.63 ± 0.37 (73 ± 13)                                                    | 0.13 ± 0.01 (98 ± 4)                                                     | 0.2                                                           | 1.1                                                           |
| PD-184352             | 13.21 ± 0.00 (97 ± 4)                                                    | 17.98 ± 1.17 (100 ± 7)                                                   | 1.0                                                           | 0.8                                                           |
| PI-103                | Inactive                                                                 | 0.37 ± 0.02 (85 ± 5)                                                     | N/A                                                           | 2.5                                                           |
| PP-242                | 33.60 ± 6.28 (49 ± 20)                                                   | 0.95 ± 0.22 (105 ± 7)                                                    | 0.1                                                           | 2.2                                                           |
| Proscillaridin A      | 0.09 ± 0.03 (87 ± 20)                                                    | 0.02 ± 0.00 (98 ± 2)                                                     | 0.1                                                           | 0.5                                                           |
| Selumetinib           | 22.83 ± 3.89 (105 ± 4)                                                   | 0.27 ± 0.06 (36 ± 3)                                                     | 0.07                                                          | 5.5                                                           |
| Sunitinib             | Inactive                                                                 | 18.99 ± 4.34 (90 ± 7)                                                    | N/A                                                           | 0.6                                                           |
| Topotecan             | 4.30 ± 1.20 (54 ± 22)                                                    | 0.10 ± 0.01 (100 ± 2)                                                    | 0.5                                                           | 21                                                            |
| Trametinib            | 0.64 ± 0.11 (87 ± 3)                                                     | 0.06 ± 0.02 (52 ± 7)                                                     | 5                                                             | 50                                                            |
| Vemurafenib           | 31.79 ± 9.41 (63 ± 4)                                                    | 14.35 ± 1.97 (92 ± 5)                                                    | 0.4                                                           | 0.9                                                           |
| Wortmannin            | Inactive                                                                 | 7.00 ± 4.33 (80 ± 3)                                                     | N/A                                                           | 0.1                                                           |

**Supplementary Table S9: List of human hypoxia signaling genes including HIF-1 and its co-transcription factors, other HIF-1 interacting proteins, and responsive genes (i.e., angiogenesis, coagulation, DNA damage and repair, metabolism, apoptosis, cell proliferation, transcription factors, transporters/channels/receptors, and other)**

| Symbol          | Refseq       | Gene Description                                                   | Function Class                               |
|-----------------|--------------|--------------------------------------------------------------------|----------------------------------------------|
| <i>ADM</i>      | NM_001124    | Adrenomedullin                                                     | Apoptosis & cell proliferation               |
| <i>ADORA2B</i>  | NM_000676    | Adenosine A2b receptor                                             | Angiogenesis                                 |
| <i>ALDOA</i>    | NM_000034    | Aldolase A, fructose-bisphosphate                                  | Coagulation & metabolism                     |
| <i>ANGPTL4</i>  | NM_001039667 | Angiopoietin-like 4                                                | Angiogenesis                                 |
| <i>ANKRD37</i>  | NM_181726    | Ankyrin repeat domain 37                                           | Other responsive genes                       |
| <i>ANXA2</i>    | NM_004039    | Annexin A2                                                         | Angiogenesis & coagulation                   |
| <i>APEX1</i>    | NM_080649    | APEX nuclease (multifunctional DNA repair enzyme) 1                | Other HIF-1 interactors                      |
| <i>ARNT</i>     | NM_001668    | Aryl hydrocarbon receptor nuclear translocator                     | HIF-1 & co-transcription factors             |
| <i>ATR</i>      | NM_001184    | Ataxia telangiectasia and Rad3 related                             | DNA damage and repair                        |
| <i>BHLHE40</i>  | NM_003670    | Basic helix-loop-helix family, member e40                          | Transcription factors                        |
| <i>BLM</i>      | NM_000057    | Bloom syndrome, RecQ helicase-like                                 | Cell proliferation                           |
| <i>BNIP3</i>    | NM_004052    | BCL2/adenovirus E1B 19kDa interacting protein 3                    | Apoptosis                                    |
| <i>BNIP3L</i>   | NM_004331    | BCL2/adenovirus E1B 19kDa interacting protein 3-like               | Apoptosis                                    |
| <i>BTG1</i>     | NM_001731    | B-cell translocation gene 1, anti-proliferative                    | Angiogenesis, apoptosis & cell proliferation |
| <i>CA9</i>      | NM_001216    | Carbonic anhydrase IX                                              | Other responsive genes                       |
| <i>CCNG2</i>    | NM_004354    | Cyclin G2                                                          | Cell proliferation                           |
| <i>COP5</i>     | NM_006837    | COP9 constitutive photomorphogenic homolog subunit 5 (Arabidopsis) | HIF-1 & co-transcription factors             |
| <i>CTSA</i>     | NM_000308    | Cathepsin A                                                        | Other responsive genes                       |
| <i>DDIT4</i>    | NM_019058    | DNA-damage-inducible transcript 4                                  | Metabolism & apoptosis                       |
| <i>DNAJC5</i>   | NM_025219    | DnaJ (Hsp40) homolog, subfamily C, member 5                        | Other responsive genes                       |
| <i>EDN1</i>     | NM_001955    | Endothelin 1                                                       | Angiogenesis                                 |
| <i>EGLN1</i>    | NM_022051    | Egl nine homolog 1 (C. elegans)                                    | Other HIF-1 interactors                      |
| <i>EGLN2</i>    | NM_053046    | Egl nine homolog 2 (C. elegans)                                    | Other HIF-1 interactors                      |
| <i>EGR1</i>     | NM_001964    | Early growth response 1                                            | Angiogenesis & cell proliferation            |
| <i>EIF4EBP1</i> | NM_004095    | Eukaryotic translation initiation factor 4E binding protein 1      | Other responsive genes                       |
| <i>ENO1</i>     | NM_001428    | Enolase 1, (alpha)                                                 | Metabolism                                   |
| <i>EPO</i>      | NM_000799    | Erythropoietin                                                     | Angiogenesis                                 |
| <i>ERO1L</i>    | NM_014584    | ERO1-like (S. cerevisiae)                                          | Metabolism                                   |
| <i>F10</i>      | NM_000504    | Coagulation factor X                                               | Coagulation                                  |
| <i>F3</i>       | NM_001993    | Coagulation factor III (thromboplastin, tissue factor)             | Angiogenesis & coagulation                   |
| <i>FOS</i>      | NM_005252    | FBJ murine osteosarcoma viral oncogene homolog                     | Transcription factors                        |
| <i>GBE1</i>     | NM_000158    | Glucan (1, 4-alpha-), branching enzyme 1                           | Metabolism                                   |
| <i>GPI</i>      | NM_000175    | Glucose-6-phosphate isomerase                                      | Angiogenesis & metabolism                    |
| <i>GYS1</i>     | NM_002103    | Glycogen synthase 1 (muscle)                                       | Metabolism                                   |

|               |           |                                                                                         |                                                        |
|---------------|-----------|-----------------------------------------------------------------------------------------|--------------------------------------------------------|
| <i>HIF1A</i>  | NM_001530 | Hypoxia inducible factor 1, alpha subunit (basic helix-loop-helix transcription factor) | HIF-1 & co-transcription factors                       |
| <i>HIF1AN</i> | NM_017902 | Hypoxia inducible factor 1, alpha subunit inhibitor                                     | HIF-1 & co-transcription factors                       |
| <i>HIF3A</i>  | NM_152794 | Hypoxia inducible factor 3, alpha subunit                                               | HIF-1 & co-transcription factors                       |
| <i>HK2</i>    | NM_000189 | Hexokinase 2                                                                            | Metabolism                                             |
| <i>HMOX1</i>  | NM_002133 | Heme oxygenase (decycling) 1                                                            | Angiogenesis                                           |
| <i>HNF4A</i>  | NM_178849 | Hepatocyte nuclear factor 4, alpha                                                      | HIF-1 & co-transcription factors                       |
| <i>IER3</i>   | NM_003897 | Immediate early response 3                                                              | Apoptosis                                              |
| <i>IGFBP3</i> | NM_000598 | Insulin-like growth factor binding protein 3                                            | Cell proliferation                                     |
| <i>JMJD6</i>  | NM_015167 | Jumonji domain containing 6                                                             | Angiogenesis                                           |
| <i>LDHA</i>   | NM_005566 | Lactate dehydrogenase A                                                                 | Metabolism                                             |
| <i>LGALS3</i> | NM_002306 | Lectin, galactoside-binding, soluble, 3                                                 | Other responsive genes                                 |
| <i>LOX</i>    | NM_002317 | Lysyl oxidase                                                                           | Angiogenesis                                           |
| <i>MAP3K1</i> | NM_005921 | Mitogen-activated protein kinase kinase kinase 1                                        | Other responsive genes                                 |
| <i>MET</i>    | NM_000245 | Met proto-oncogene (hepatocyte growth factor receptor)                                  | Cell proliferation                                     |
| <i>MIF</i>    | NM_002415 | Macrophage migration inhibitory factor (glycosylation-inhibiting factor)                | DNA damage and repair & apoptosis & cell proliferation |
| <i>MMP9</i>   | NM_004994 | Matrix metalloproteinase 9 (gelatinase B, 92kDa gelatinase, 92kDa type IV collagenase)  | Angiogenesis                                           |
| <i>MXI1</i>   | NM_005962 | MAX interactor 1                                                                        | Cell proliferation                                     |
| <i>NAMPT</i>  | NM_005746 | Nicotinamide phosphoribosyltransferase                                                  | Cell proliferation                                     |
| <i>NCOA1</i>  | NM_003743 | Nuclear receptor coactivator 1                                                          | HIF-1 & co-transcription factors                       |
| <i>NDRG1</i>  | NM_006096 | N-myc downstream regulated 1                                                            | DNA damage and repair                                  |
| <i>NFKB1</i>  | NM_003998 | Nuclear factor of kappa light polypeptide gene enhancer in B-cells 1                    | Other HIF-1 interactors                                |
| <i>NOS3</i>   | NM_000603 | Nitric oxide synthase 3 (endothelial cell)                                              | Apoptosis & cell proliferation                         |
| <i>ODC1</i>   | NM_002539 | Ornithine decarboxylase 1                                                               | Cell proliferation                                     |
| <i>P4HA1</i>  | NM_000917 | Prolyl 4-hydroxylase, alpha polypeptide I                                               | Other HIF-1 interactors                                |
| <i>P4HB</i>   | NM_000918 | Prolyl 4-hydroxylase, beta polypeptide                                                  | Other HIF-1 interactors                                |
| <i>PDK1</i>   | NM_002610 | Pyruvate dehydrogenase kinase, isozyme 1                                                | Metabolism                                             |
| <i>PER1</i>   | NM_002616 | Period homolog 1 (Drosophila)                                                           | HIF-1 & co-transcription factors                       |
| <i>PFKFB3</i> | NM_004566 | 6-phosphofructo-2-kinase/fructose-2,6-biphosphatase 3                                   | Metabolism                                             |
| <i>PFKFB4</i> | NM_004567 | 6-phosphofructo-2-kinase/fructose-2,6-biphosphatase 4                                   | Metabolism                                             |
| <i>PFKL</i>   | NM_002626 | Phosphofructokinase, liver                                                              | Metabolism                                             |
| <i>PFKP</i>   | NM_002627 | Phosphofructokinase, platelet                                                           | Metabolism                                             |
| <i>PGAM1</i>  | NM_002629 | Phosphoglycerate mutase 1 (brain)                                                       | Metabolism                                             |
| <i>PGF</i>    | NM_002632 | Placental growth factor                                                                 | Angiogenesis & cell proliferation                      |
| <i>PGK1</i>   | NM_000291 | Phosphoglycerate kinase 1                                                               | Metabolism                                             |
| <i>PIM1</i>   | NM_002648 | Pim-1 oncogene                                                                          | Apoptosis & cell proliferation                         |
| <i>PKM</i>    | NM_002654 | Pyruvate kinase, muscle                                                                 | Metabolism                                             |
| <i>PLAU</i>   | NM_002658 | Plasminogen activator, urokinase                                                        | Angiogenesis & coagulation                             |
| <i>RBPJ</i>   | NM_005349 | Recombination signal binding protein for immunoglobulin kappa J region                  | Transcription factors                                  |



|                 |           |                                                                                               |                                                               |
|-----------------|-----------|-----------------------------------------------------------------------------------------------|---------------------------------------------------------------|
| <i>RUVBL2</i>   | NM_006666 | RuvB-like 2 (E. coli)                                                                         | DNA damage and repair                                         |
| <i>SERPINE1</i> | NM_000602 | Serpin peptidase inhibitor, clade E (nexin, plasminogen activator inhibitor type 1), member 1 | Angiogenesis & coagulation                                    |
| <i>SLC16A3</i>  | NM_004207 | Solute carrier family 16, member 3 (monocarboxylic acid transporter 4)                        | Coagulation                                                   |
| <i>SLC2A1</i>   | NM_006516 | Solute carrier family 2 (facilitated glucose transporter), member 1                           | Metabolism & transporters, channels, and receptors            |
| <i>SLC2A3</i>   | NM_006931 | Solute carrier family 2 (facilitated glucose transporter), member 3                           | Metabolism & transporters, channels, and receptors            |
| <i>TFRC</i>     | NM_003234 | Transferrin receptor (p90, CD71)                                                              | Transporters, channels, and receptors                         |
| <i>TP53</i>     | NM_000546 | Tumor protein p53                                                                             | Other HIF-1 interactors                                       |
| <i>TPI1</i>     | NM_000365 | Triosephosphate isomerase 1                                                                   | Metabolism                                                    |
| <i>TXNIP</i>    | NM_006472 | Thioredoxin interacting protein                                                               | Cell proliferation                                            |
| <i>USF2</i>     | NM_003367 | Upstream transcription factor 2, c-fos interacting                                            | Transcription factors                                         |
| <i>VDAC1</i>    | NM_003374 | Voltage-dependent anion channel 1                                                             | Transcription factors & transporters, channels, and receptors |
| <i>VEGFA</i>    | NM_003376 | Vascular endothelial growth factor A                                                          | Angiogenesis                                                  |

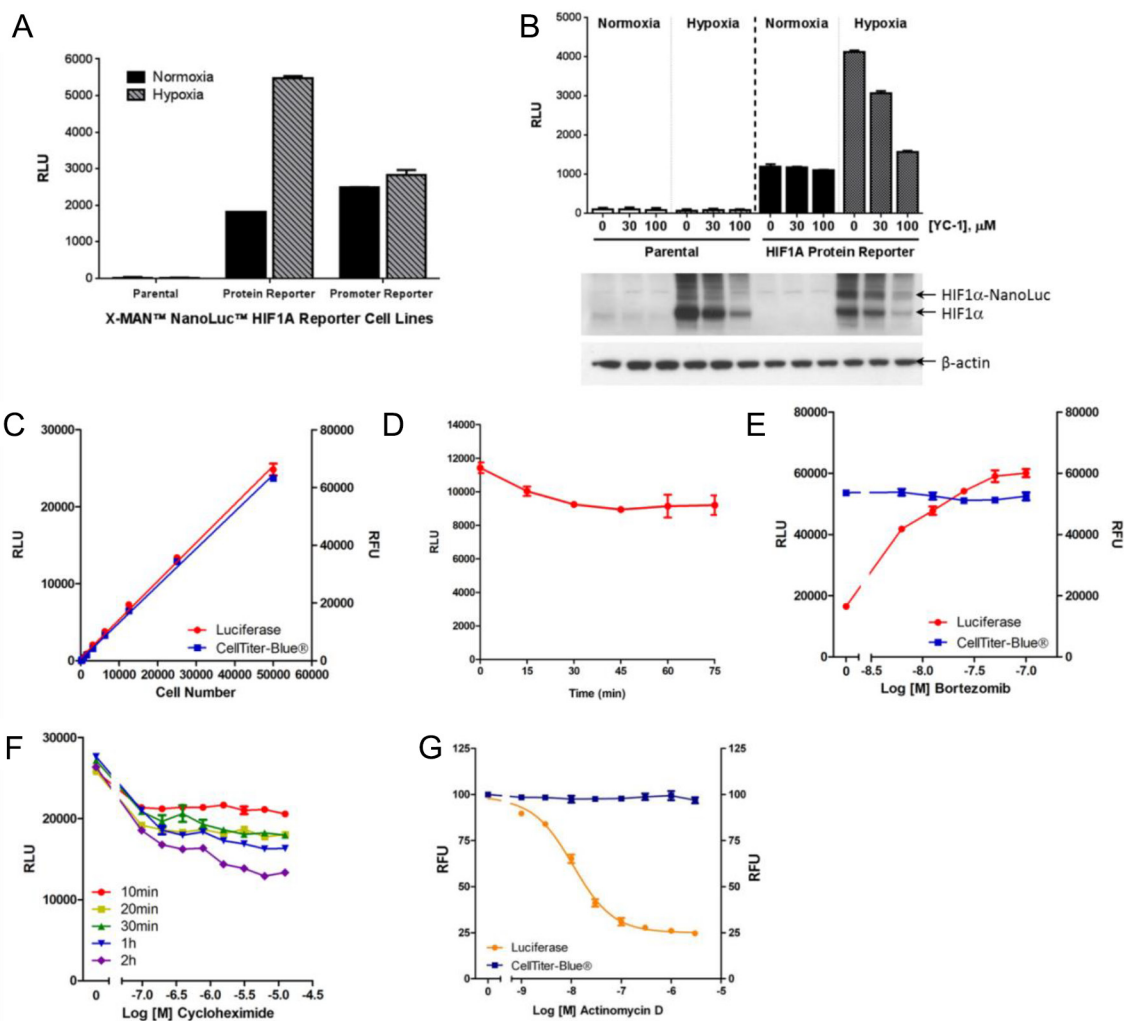

**Supplementary Figure S1: Development and validation of HIF-1 $\alpha$ -NanoLuc assay.** (A) A three-fold increase in hypoxia-induced luciferase activity of HIF-1 $\alpha$ -NanoLuc protein reporter cells was observed after exposing cells to 1% O<sub>2</sub> (hypoxia) and 20% O<sub>2</sub> (normoxia) for four hours. (B) *Top*: Under hypoxic conditions HIF-1 $\alpha$ -NanoLuc HCT116 cells responded to the HIF-1 inhibitor (YC-1) with a decrease in luciferase expression in a concentration response manner. *Bottom*: The increased levels of HIF-1 $\alpha$  protein under the same hypoxic treatment were evident on Western blots in both parental and HIF-1 $\alpha$ -NanoLuc cells. (C) The assay exhibited a linear correlation between luciferase signals and cell number. (D) The assay has stable decay kinetics. (E) Exposure of HIF-1 $\alpha$ -NanoLuc cells to a proteasome inhibitor (bortezomib) resulted in protein accumulation and increased luciferase activity. (F) HIF-1 $\alpha$ -NanoLuc cells treated with cycloheximide showed reduced protein turnover and decreased luciferase signal. (G) Treatment of HIF-1 $\alpha$ -NanoLuc cells with a transcription inhibitor (actinomycin) caused reduced NanoLuc activity.

For western blot analysis, HCT116 and HIF-1 $\alpha$ -NanoLuc cells were seeded into 6-well plates and incubated with YC-1 at 37°C, 5% CO<sub>2</sub> under normoxic or hypoxic (1% O<sub>2</sub>) conditions for four hours. Cells were lysed in Tris-Glycine buffer and the protein concentration was determined using the BCA protein assay (Thermo Fisher Scientific). Proteins loaded onto 10% Bis-Tris gels were resolved by SDS-PAGE and transferred onto PVDF membranes (Life Technologies). Anti-HIF-1 $\alpha$  antibody (1:500; BD Transduction Labs), anti- $\beta$ -actin antibody (1:500,000; Sigma-Aldrich), appropriate secondary antibodies (Cell Signaling Technology), and ECL-Plus detection reagent (GE Healthcare Bio-Sciences) were used to immunoblot protein levels of the corresponding targets according manufacturer's protocols.

**A**

| Curve Class | Efficacy                 | Curve    | Curve fit |
|-------------|--------------------------|----------|-----------|
| -1.1 & 1.1  | High                     | Complete | Good      |
| -1.2 & 1.2  | Partial                  | Complete | Good      |
| -1.3 & 1.3  | High                     | Complete | Poor      |
| -1.4 & 1.4  | Partial                  | Complete | Poor      |
| -2.1 & 2.1  | High                     | Partial  | Good      |
| -2.2 & 2.2  | Partial                  | Partial  | Good      |
| -2.3 & 2.3  | High                     | Partial  | Poor      |
| -2.4 & 2.4  | Partial                  | Partial  | Poor      |
| -3 & 3      | Single point of Activity |          |           |
| 4           | Inactive                 |          |           |

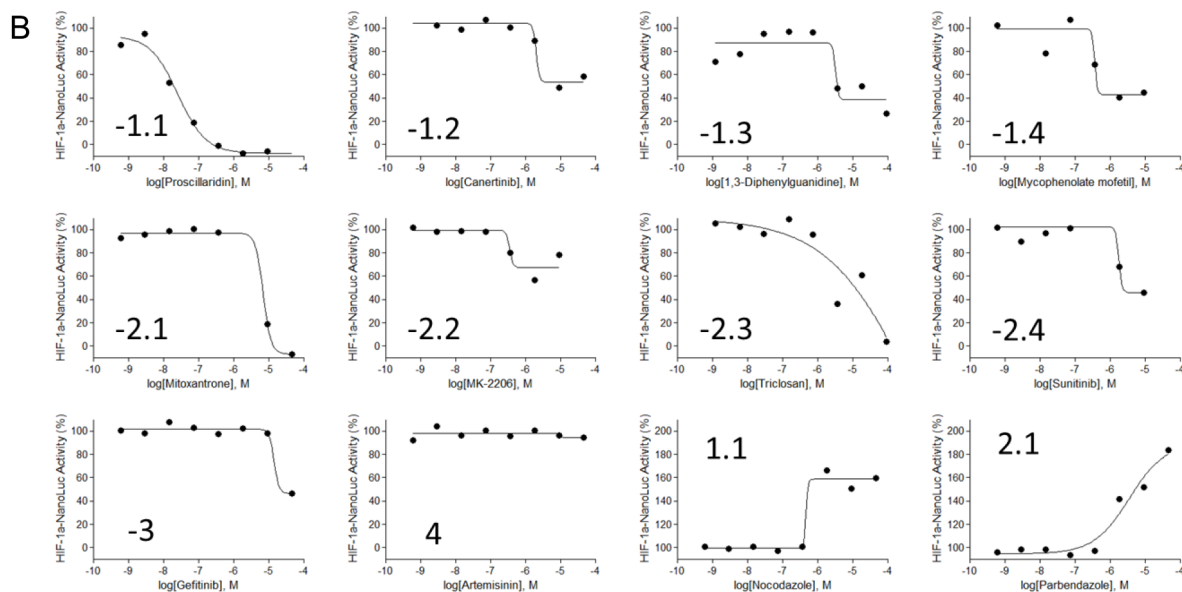

**Supplementary Figure S2: Concentration-response curves and curve classes of selected HIF-1 $\alpha$ -NanoLuc inhibitor hits identified from primary screening.** (A) Categories of curve classes based on efficacy, curve completeness, and goodness of curve fit. Inactive compounds were assigned to curve class 4. Other compounds with positive curve classes are activators and ones with negative curve classes are inhibitors. (B) Examples of identified HIF-1 $\alpha$ -NanoLuc hits representation each curve class.

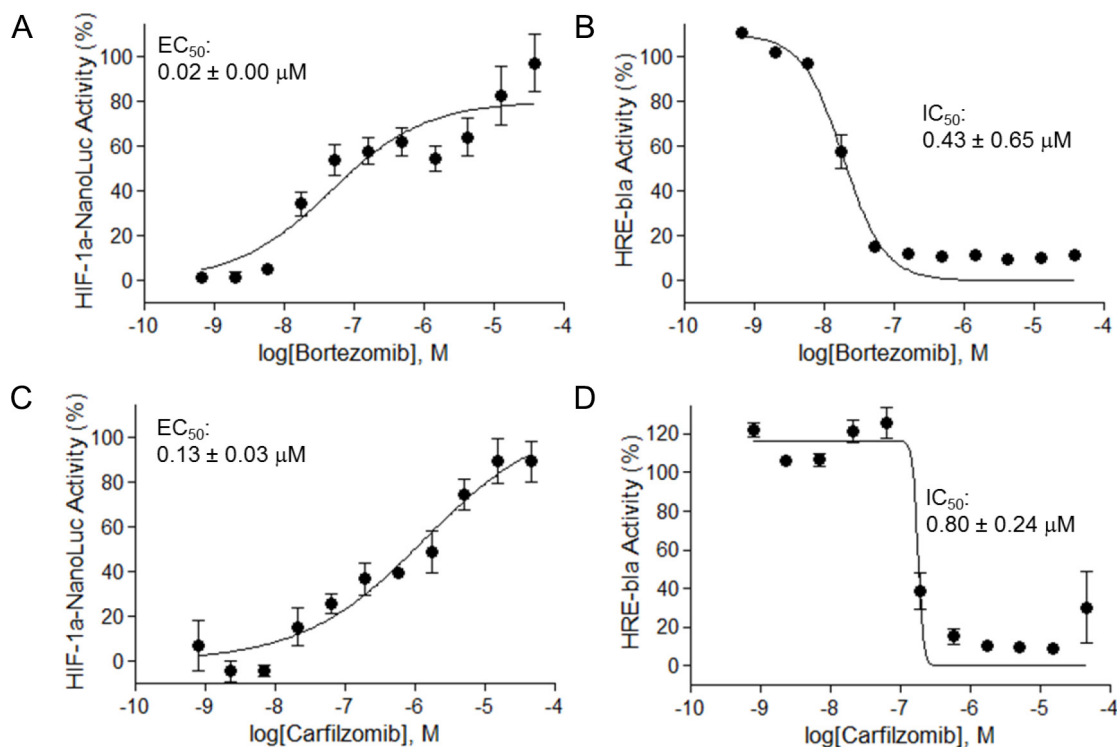

**Supplementary Figure S3: Concentration-response curves of bortezomib and carfilzomib measured in the HIF-1 $\alpha$ -NanoLuc and the HRE-bla confirmatory screens.** (A) Bortezomib in HIF-1 $\alpha$ -NanoLuc assay. (B) Bortezomib in HRE-bla assay. (C) Carfilzomib in HIF-1 $\alpha$ -NanoLuc assay. (D) Carfilzomib in HRE-bla assay. The data was obtained from three independent measurements and represented as mean  $\pm$  standard deviation.

## REFERENCES

- Nagle DG, Zhou YD. Natural product-based inhibitors of hypoxia-inducible factor-1 (HIF-1). *Curr Drug Targets*. 2006; 7:355–369.
- Semenza GL. Evaluation of HIF-1 inhibitors as anticancer agents. *Drug Discov Today*. 2007; 12:853–859.
- Oda S, Oda T, Takabuchi S, Nishi K, Wakamatsu T, Tanaka T, Adachi T, Fukuda K, Nohara R, Hirota K. The calcium channel blocker cilnidipine selectively suppresses hypoxia-inducible factor 1 activity in vascular cells. *Eur J Pharmacol*. 2009; 606:130–136.
- Lee K, Qian DZ, Rey S, Wei H, Liu JO, Semenza GL. Anthracycline chemotherapy inhibits HIF-1 transcriptional activity and tumor-induced mobilization of circulating angiogenic cells. *Proc Natl Acad Sci U S A*. 2009; 106:2353–2358.
- Zhang H, Qian DZ, Tan YS, Lee K, Gao P, Ren YR, Rey S, Hammers H, Chang D, Pili R, Dang CV, Liu JO, Semenza GL. Digoxin and other cardiac glycosides inhibit HIF-1 $\alpha$  synthesis and block tumor growth. *Proc Natl Acad Sci U S A*. 2008; 105:19579–19586.
- Park HJ, Kim MS, Cho K, Yun JH, Choi YJ, Cho CH. Disulfiram deregulates HIF- $\alpha$  subunits and blunts tumor adaptation to hypoxia in hepatoma cells. *Acta Pharmacol Sin*. 2013; 34:1208–1216.
- Zhou YD, Kim YP, Mohammed KA, Jones DK, Muhammad I, Dunbar DC, Nagle DG. Terpenoid tetrahydroisoquinoline alkaloids emetine, klugine, and isocephaline inhibit the activation of hypoxia-inducible factor-1 in breast tumor cells. *J Nat Prod*. 2005; 68:947–950.
- Newcomb EW, Ali MA, Schnee T, Lan L, Lukyanov Y, Fowkes M, Miller DC, Zagzag D. Flavopiridol downregulates hypoxia-mediated hypoxia-inducible factor-1 $\alpha$  expression in human glioma cells by a proteasome-independent pathway: implications for in vivo therapy. *Neuro Oncol*. 2005; 7:225–235.
- Toh YM, Li TK. Mitoxantrone inhibits HIF-1 $\alpha$  expression in a topoisomerase II-independent pathway. *Clin Cancer Res*. 2011; 17:5026–5037.
- Pore N, Gupta AK, Cerniglia GJ, Maity A. HIV protease inhibitors decrease VEGF/HIF-1 $\alpha$  expression and angiogenesis in glioblastoma cells. *Neoplasia*. 2006; 8:889–895.
- Liu LP, Ho RL, Chen GG, Lai PB. Sorafenib inhibits hypoxia-inducible factor-1 $\alpha$  synthesis: implications for antiangiogenic activity in hepatocellular carcinoma. *Clin Cancer Res*. 2012; 18:5662–5671.
